# Supplementary material for: Carbonate Apatite Nanoparticles-Facilitated Intracellular Delivery of siRNA(s) Targeting Calcium Ion Channels Efficiently Kills Breast Cancer Cells
Source: MDPI journal article supplement (doi:10.3390/toxics6030034), 2018-06-26
Supplement: s1 [file s1]

## Supplementary Materials: Carbonate Apatite Nanoparticles-Facilitated Intracellular Delivery of siRNA(s) Targeting Calcium Ion Channels Efficiently Kills Breast Cancer Cells

Mohammad Borhan Uddin, Balakavitha Balaravi Pillai, Kyi Kyi Tha, Maeirah Ashaie, Md. Emranul Karim and Ezharul Hoque Chowdhury

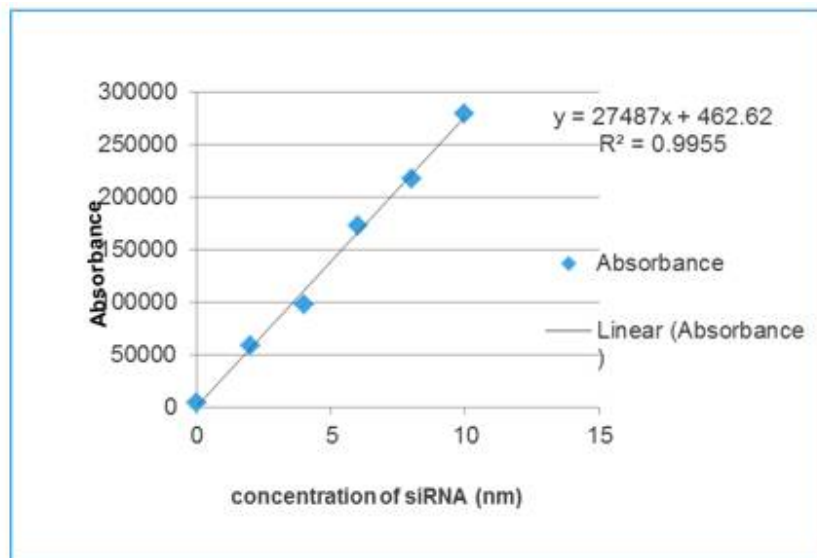

Figure S1. Calibration curve for fluorescence-labeled siRNA.

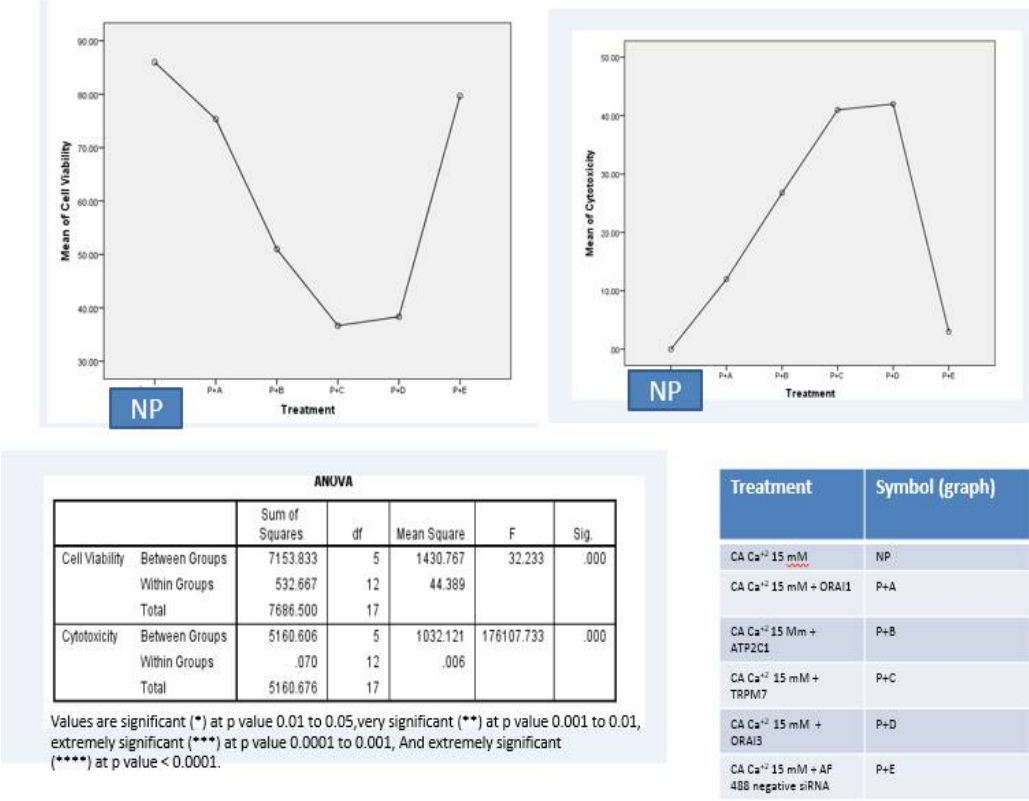

**Figure S2.** Statistical analysis of cell viability following NPs-mediated intracellular delivery of selected siRNAs targeting cation transporters and channels.
